# Supplementary figures and images for: Tropheryma whipplei, the Whipple's disease bacillus, induces macrophage apoptosis through the extrinsic pathway
Source: PubMed Central journal article supplement — Cell Death Dis. 2010 Apr 8;1(4):e34–. doi: 10.1038/cddis.2010.11 (PMC3032299; doi:10.1038/cddis.2010.11), 2010-04-08

**A**

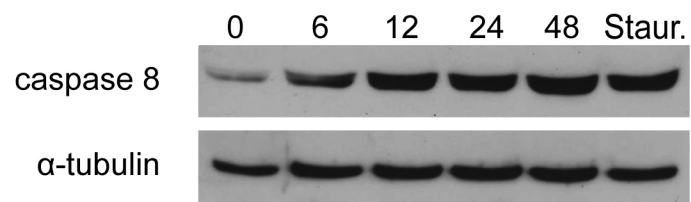

**B**

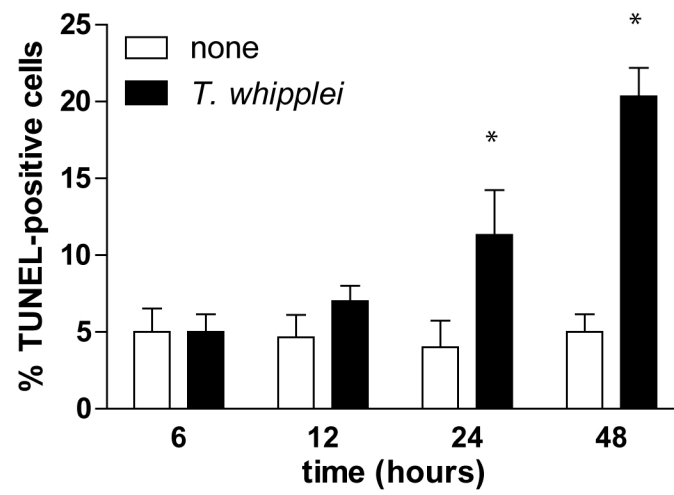

Supplement: cddis201011x1.pdf [file cddis201011x1.pdf]
